# Supplementary material
Source: Springer Nature journal article supplement (https://www.springermedizin.de/resource/supplementary/12968_2011_2606_MOESM2_ESM.pdf/9582308)

(A) Distal

(B) Proximal

(C) Distal and proximal

4000

3500

3000

2500

2000

1500

1000

500

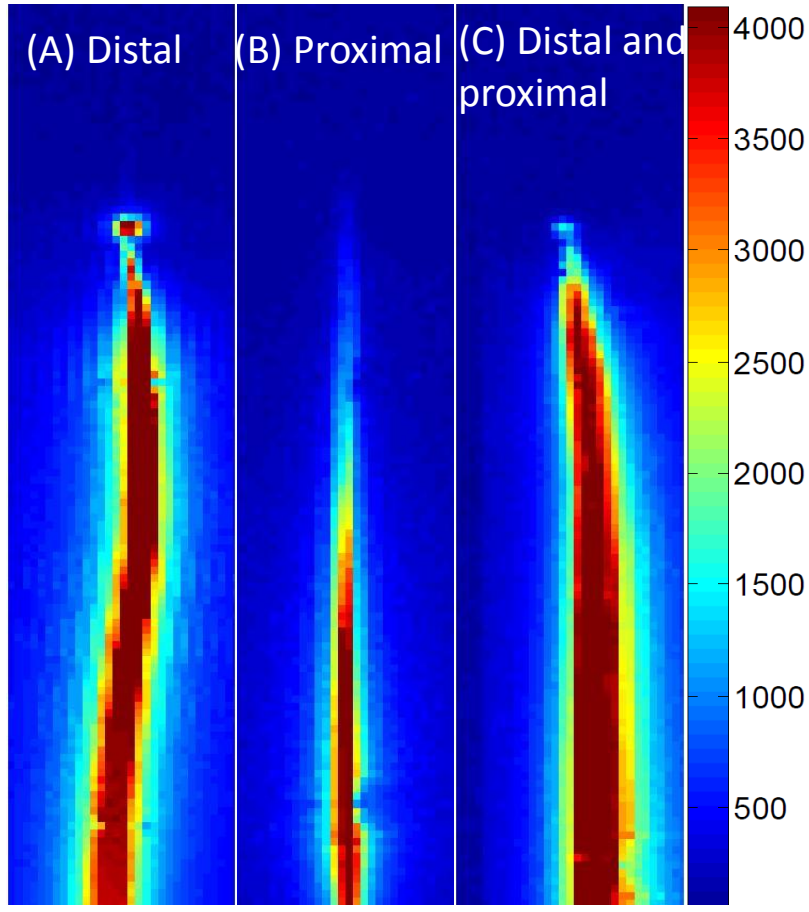

Supplement: MOESM2 [file 9582308]
